# Supplementary material for: Colorimetric Paper Sensor for Food Spoilage Based on Biogenic Amine Monitoring
Source: MDPI journal article supplement (doi:10.3390/bios13010126), 2023-01-11
Supplement: s1 [file s1]

## **Supplementary Materials**

### **Colorimetric paper sensor for food spoilage based on biogenic amines monitoring**

Maria Maddalena Calabretta<sup>1,2</sup>, Denise Gregucci<sup>1,2</sup>, Riccardo Desiderio<sup>1</sup> and Elisa Michelini<sup>1,2,3\*</sup>

<sup>1</sup>Department of Chemistry “Giacomo Ciamician”, Alma Mater Studiorum - University of Bologna,  
Via Selmi 2, 40126, Bologna, Italy

<sup>2</sup>Center for Applied Biomedical Research (CRBA), Azienda Ospedaliero-Universitaria Policlinico S.  
Orsola-Malpighi, Bologna, Italy

<sup>3</sup>Health Sciences and Technologies Interdepartmental Center for Industrial Research (HSTICIR),  
University of Bologna, 40126 Bologna, Italy

\*Corresponding author:

Prof. Dr. Elisa Michelini

Departement of Chemistry “Giacomo Ciamician”

University of Bologna

Via Selmi 2, 40126 Bologna, Italy

Tel.: +39 051 20 9 9533

e-mail: elisa.michelini8@unibo.it

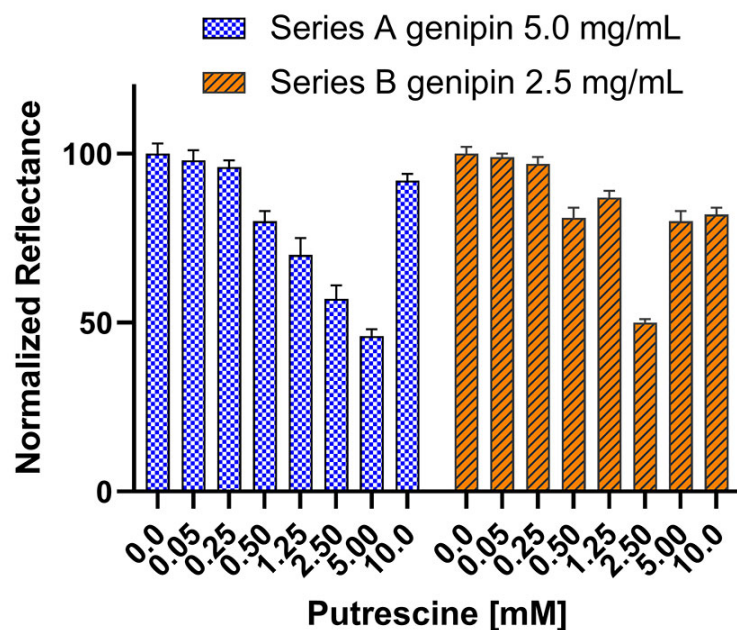

**Figure S1:** Sensor responsiveness in liquid format obtained in clear microtiter 96-well plate adding 40  $\mu\text{L}$  of 5.0 mg/mL genipin (series A) or 2.5 mg/mL (series B) solution and a 40  $\mu\text{L}$  volume of putrescine (concentration range from 0 to 5 mM) and incubated at 25°C for 18 h.

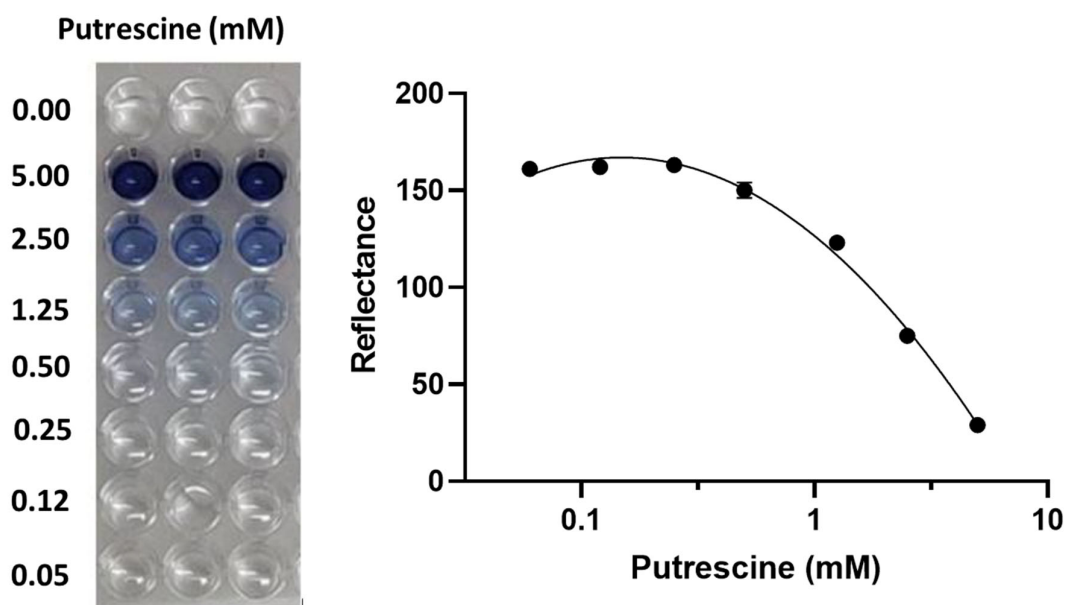

**Figure S2:** Picture and data elaboration of sensor responsiveness in liquid format in 96-microtiter plate obtained adding 40  $\mu\text{L}$  of 5.0 mg/mL genipin and a 40  $\mu\text{L}$ -volume of putrescine (concentration range from 0 to 5 mM) and incubated at 25°C for 3 h.

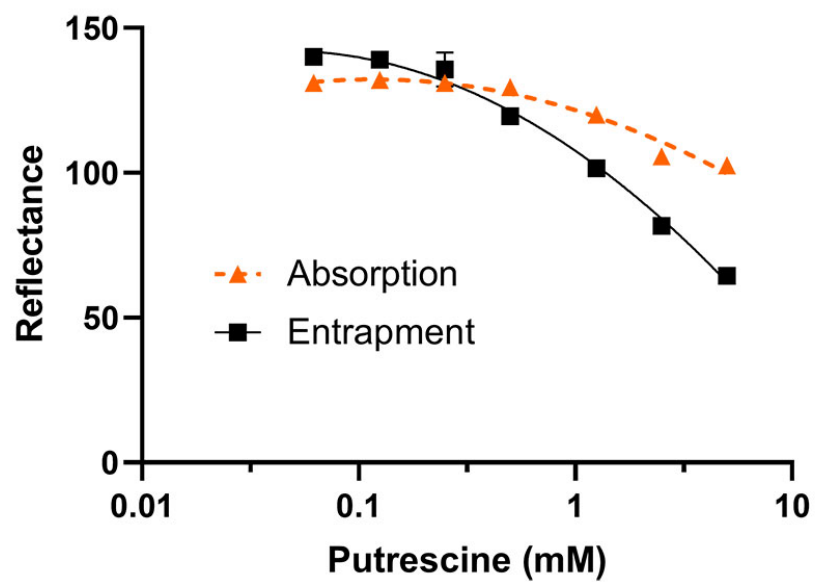

**Figure S3:** Putrescine calibration curves obtained with genipin (5.0 mg/mL) adsorbed and entrapped on paper, after 3 h of incubation at +25°C.
